# Supplementary material
Source: Springer Nature journal article supplement (https://www.springermedizin.de/resource/supplementary/13002_2007_100_MOESM1_ESM.pdf/9627162)
Supplement: MOESM1 [file 9627162]

Additional file 1. Folk medicinal plant uses in Alto Tirreno Cosentino area (Calabria, Southern Italy)

| <i>Scientific name/<br/>Family</i>          | <i>Vernacular<br/>name</i> | <i>Folk medical<br/>use</i>                                    | <i>Part(s) used</i>   | <i>Manipulation</i>                                                                                                                                                                                           | <i>Sites where<br/>the folk<br/>medical<br/>use has<br/>been<br/>recorded</i> | <i>Notes about folk uses<br/>in different areas of<br/>Calabria [1, 2, 5, 6]<br/>and/or in other Italian<br/>regions [7- 48]</i>                                                                                                                                                                                           |
|---------------------------------------------|----------------------------|----------------------------------------------------------------|-----------------------|---------------------------------------------------------------------------------------------------------------------------------------------------------------------------------------------------------------|-------------------------------------------------------------------------------|----------------------------------------------------------------------------------------------------------------------------------------------------------------------------------------------------------------------------------------------------------------------------------------------------------------------------|
| 1 Agavaceae                                 |                            |                                                                |                       |                                                                                                                                                                                                               |                                                                               |                                                                                                                                                                                                                                                                                                                            |
| <i>Agave americana</i><br>L.<br>ga 1        | Aloia                      | Muscular and<br>rheumatic pains                                | Leaves                | The decoction,<br>left overnight, is<br>locally rubbed                                                                                                                                                        | Verb. Ma.                                                                     |                                                                                                                                                                                                                                                                                                                            |
| 2 Anacardiaceae                             |                            |                                                                |                       |                                                                                                                                                                                                               |                                                                               |                                                                                                                                                                                                                                                                                                                            |
| <i>Pistacia lentiscus</i><br>L.<br>ana 1    | Scinu                      | Swollen gums                                                   | Branches              | The sap<br>dropping<br>out after having<br>cut the stems, in<br>mouth-washes                                                                                                                                  | Verb., Ma.<br>Belv.<br>M. mo                                                  | The same use has been<br>recorded in different<br>areas of Calabria<br>region [7]                                                                                                                                                                                                                                          |
| 3 Araceae                                   |                            |                                                                |                       |                                                                                                                                                                                                               |                                                                               |                                                                                                                                                                                                                                                                                                                            |
| <i>Arum<br/>maculatum</i><br>L.<br>ara 1    | Anzana                     | Antiseptic,<br>Cicatrizing,<br>To treat corns                  | Tuber<br>Leaves       | The sliced tuber<br>or the fresh<br>leaves are boiled<br>and locally<br>applied on<br>wounds and<br>burns.<br>The juice from<br>the<br>squashed tuber<br>is<br>externally<br>applied<br>on warts and<br>corns | Verb.                                                                         | The informants<br>indicated this species,<br>but probably <i>Arum<br/>italicum</i> Miller is also<br>used for the same<br>purposes                                                                                                                                                                                         |
| 4 Araliaceae                                |                            |                                                                |                       |                                                                                                                                                                                                               |                                                                               |                                                                                                                                                                                                                                                                                                                            |
| <i>Hedera helix</i><br>L.<br>arali 1        | Giss'                      | To treat<br>toothache<br>and decay                             | Stems and<br>branches | The sap<br>dropping<br>out after having<br>cut the stem is<br>locally applied                                                                                                                                 | Verb., Gri.,                                                                  | In the province of<br>Reggio Calabria this<br>species is used to<br>soothe cough,<br>bronchitis, and to heal<br>sores [6]                                                                                                                                                                                                  |
| 5 Betulaceae                                |                            |                                                                |                       |                                                                                                                                                                                                               |                                                                               |                                                                                                                                                                                                                                                                                                                            |
| <i>Alnus cordata</i> L.<br>betu 1           | Avezen'                    | To remove warts<br>and corns                                   | Leaves                | The fresh leaves<br>are locally<br>rubbed                                                                                                                                                                     | Ma. Gri.,<br>Papa.                                                            |                                                                                                                                                                                                                                                                                                                            |
| 6 Caprifoliaceae                            |                            |                                                                |                       |                                                                                                                                                                                                               |                                                                               |                                                                                                                                                                                                                                                                                                                            |
| <i>Sambucus<br/>ebulus</i><br>L.<br>capri 1 | Jemili                     | To treat lice in<br>poultry                                    | The whole<br>plant    | A bunch of the<br>fresh plants is<br>hung up inside<br>the hen-house                                                                                                                                          | Verb., Gri.                                                                   | The same use has been<br>recorded in Veneto<br>region [47]                                                                                                                                                                                                                                                                 |
| <i>Sambucus nigra</i><br>L.<br>capri 2      | Majo                       | To treat swollen<br>breast and legs,<br>and rheumatic<br>pains | Dried flowers         | Decoction in<br>external washes<br>on the affected<br>body district                                                                                                                                           | Buonv.,<br>Papa.                                                              | In Calabria other uses<br>of this species have<br>been recorded: the<br>decoction of flowers<br>with sugar is<br>considered expectorant<br>(without sugar is a<br>lenitive in case of<br>erythemas) and an<br>ointment obtained<br>from the bark or the<br>fresh leaves is used<br>against burns.<br>The cataplasm made of |

|    |                                                     |                 |                            |                             |                                                                                                                                                                                  |                                                                                                                                                                                                                                                                                                                          |
|----|-----------------------------------------------------|-----------------|----------------------------|-----------------------------|----------------------------------------------------------------------------------------------------------------------------------------------------------------------------------|--------------------------------------------------------------------------------------------------------------------------------------------------------------------------------------------------------------------------------------------------------------------------------------------------------------------------|
|    |                                                     |                 |                            |                             |                                                                                                                                                                                  | the heated leaves was considered anti-rheumatic; it is also applied on the breast to resolve milk obstruction. The infusion of the flowers is considered a good mouthwash for treating inflammations and thrush in children, or eye salve in conjunctivitis [1]. It was used also as an anti-rheumatic and purgative [6] |
| 7  | Cesalpinoaceae                                      |                 |                            |                             |                                                                                                                                                                                  |                                                                                                                                                                                                                                                                                                                          |
|    | <i>Ceratonia siliqua</i> L. cesa 1                  | Caroba          | Emollient                  | Fruits                      | Decoction with <i>Ficus carica</i> L., <i>Malva sylvestris</i> L., and <i>Prunus persica</i> (L.) Batsch                                                                         | Verb.                                                                                                                                                                                                                                                                                                                    |
| 8  | Compositae                                          |                 |                            |                             |                                                                                                                                                                                  |                                                                                                                                                                                                                                                                                                                          |
|    | <i>Matricaria chamomilla</i> L. aste 1              | Capomilla       | To treat abdominal pains   | Flowers                     | Decoction with <i>Malva sylvestris</i> L., <i>Calamintha nepeta</i> (L.) Savi, and <i>Sambucus nigra</i> L.                                                                      | Verb. Gri. Buonv., Papa.                                                                                                                                                                                                                                                                                                 |
|    | <i>Tussilago farfara</i> L. aste 2                  | Frunn' i canale | Against cough, balsamic    | Roots, leaves and flowers   | Syrup prepared by a decoction of the roots, or infusion of the fresh leaves and flowers mixed with <i>Malva sylvestris</i> L., <i>Hordeum vulgare</i> L., and <i>Urtica</i> spp. | Verb., Papa                                                                                                                                                                                                                                                                                                              |
| 9  | Crassulaceae                                        |                 |                            |                             |                                                                                                                                                                                  |                                                                                                                                                                                                                                                                                                                          |
|    | <i>Umbilicus rupestris</i> (Salisb.) Dandy crassu 1 | Cucch'          | To treat chilblains, warts | Leaves without outer "peel" | Cataplasm or bandage imbibed of the decoction, locally applied                                                                                                                   | Orso. Sang.                                                                                                                                                                                                                                                                                                              |
| 10 | Cruciferae                                          |                 |                            |                             |                                                                                                                                                                                  |                                                                                                                                                                                                                                                                                                                          |
|    | <i>Sisymbrium officinale</i> L. brassi 1            | Erisimo         | To treat cold              | Whole plant                 | Decoction with <i>Tilia platyphyllos</i> Scop. and <i>Salix alba</i> L.                                                                                                          | Verb., Sang.                                                                                                                                                                                                                                                                                                             |
| 11 | Ebenaceae                                           |                 |                            |                             |                                                                                                                                                                                  |                                                                                                                                                                                                                                                                                                                          |
|    | <i>Diospyros kaki</i> L. Fil. ebe 1                 | Cachino         | As a tea substitute        | Leaves                      | Infusion                                                                                                                                                                         | Aie.                                                                                                                                                                                                                                                                                                                     |
| 12 | Equisetaceae                                        |                 |                            |                             |                                                                                                                                                                                  |                                                                                                                                                                                                                                                                                                                          |
|    | <i>Equisetum telmateja</i> Ehrh. equi 1             | Cuda ' i vurpa  | Haemostatic Stomachic      | Stems                       | Compresses imbibed of the infusion                                                                                                                                               | Buonv. Toxic plant!                                                                                                                                                                                                                                                                                                      |
| 13 |                                                     |                 |                            |                             |                                                                                                                                                                                  |                                                                                                                                                                                                                                                                                                                          |

|                                        |                 |                                                                                                    |                                                      |                                                                                                                                                              |                 |                                                                                                                                                                                                                                                        |
|----------------------------------------|-----------------|----------------------------------------------------------------------------------------------------|------------------------------------------------------|--------------------------------------------------------------------------------------------------------------------------------------------------------------|-----------------|--------------------------------------------------------------------------------------------------------------------------------------------------------------------------------------------------------------------------------------------------------|
| Euphorbiaceae                          |                 |                                                                                                    |                                                      |                                                                                                                                                              |                 |                                                                                                                                                                                                                                                        |
| <i>Mercurialis annua</i> L.<br>eupho 1 | Mercurella      | Laxative<br>Diuretic                                                                               | Fresh plant<br>before<br>flowering                   | Decoction.                                                                                                                                                   | Verb.           | The decoction has been recorded as a laxative for cattle in Campania ([19, 41] and as a depurative in Liguria [37]                                                                                                                                     |
|                                        |                 | <i>To aid calves in suckling</i>                                                                   |                                                      | <i>Decoction mixed with Matricaria chamomilla L.</i>                                                                                                         |                 |                                                                                                                                                                                                                                                        |
| 14 Fagaceae                            |                 |                                                                                                    |                                                      |                                                                                                                                                              |                 |                                                                                                                                                                                                                                                        |
| <i>Quercus</i> sp.<br>faga 1           | Cerza           | Intestinal<br>astringent,<br>detoxifying<br><br>Cicatrizing                                        | Dried bark<br>of young<br>stems and<br>galls         | Decoction<br>(internally)<br><br>Decoction, in<br>external washes                                                                                            | Torto.          | The informants indicated <i>Quercus robur</i> L., but probably also other species of the genus were equally used. In different districts of Calabria region <i>Q. frainetto</i> Ten. is used for treating acne, rheumatisms, and for healing burns [2] |
| 15 Gramineae                           |                 |                                                                                                    |                                                      |                                                                                                                                                              |                 |                                                                                                                                                                                                                                                        |
| <i>Arundo donax</i> L.<br>poa 1        | Canna           | To treat throat<br>inflammations<br>and bronchitis<br>(see also<br><i>Spartium<br/>junceum</i> L.) | Stems<br>when they<br>are still green<br><br>Rhizome | Stems filled<br>with<br>sugar and<br>heated on fire<br>until they melt,<br>then ingested<br><br>Decoction with<br><i>Cynodon<br/>dactylon</i> L.<br>rhizomes | Verb.           | The internal membrane of a dried stem from this species is applied on wounds as a haemostatic and cicatrizing mean. The sap mixed with sugar has been recorded as a mean for treating whooping cough [6]                                               |
| <i>Avena sativa</i> L.<br>poa 2        | not<br>reported | To treat<br>abdominal<br>pains                                                                     | Seeds                                                | Decoction<br>with <i>Malus<br/>domestica</i> ,<br>(Bork.) Bork.,<br><i>Hordeum<br/>vulgare</i> L., and<br><i>Ficus carica</i> L.<br>(with honey)             | Verb            |                                                                                                                                                                                                                                                        |
| <i>Cynodon dactylon</i> L.<br>poa 3    | Gramigna        | Diuretic                                                                                           | Seeds                                                | Decoction                                                                                                                                                    | Verb.           | Decoction of the rhizome is considered able to heal cystitis; it is also lenitive for digestive, urinary and genital inflammations and it is a mild laxative too. The decoction of the aerial parts is considered an anti-rheumatic. [6]               |
| <i>Hordeum vulgare</i> L.<br>poa 4     | Oriu            | To treat cold<br>and abdominal<br>pains                                                            | Seeds                                                | Decoction<br>with sliced<br><i>Malus<br/>domestica</i><br>(Bork.) Bork.<br>fruits and <i>Ficus</i>                                                           | Verb.,<br>Papa. | A prolonged decoction of the seeds has been recorded as a mean for treating throat inflammations (gargles).                                                                                                                                            |

|                                        |                |                                                                             |                              |                                                                      |                 |                                                                                                                                                                                                                                                                  |
|----------------------------------------|----------------|-----------------------------------------------------------------------------|------------------------------|----------------------------------------------------------------------|-----------------|------------------------------------------------------------------------------------------------------------------------------------------------------------------------------------------------------------------------------------------------------------------|
|                                        |                |                                                                             |                              | <i>carica</i> L. (with honey)                                        |                 | A poultice of the same plant is considered lenitive on the skin and able to cure head whitlows [6]                                                                                                                                                               |
| <i>Triticum aestivum</i> L.<br>poa 5   | Granu          | To treat wounds and sores in cattle (e.g. caused by pack-saddle)            | Stem                         | The ash from the stems is mixed with olive oil, then locally applied | Verb.           | Grinded seeds have been recorded to be put on the skin as an anti-diaphoretic in Val di Cècina (Toscana) [45]                                                                                                                                                    |
|                                        |                | To treat finger bones dislocation                                           | Bran                         | Cataplasm with bran mixed with boiled vinegar                        |                 |                                                                                                                                                                                                                                                                  |
| <i>Zea mays</i> L.<br>poa 6            | Migliu         | To heal cystitis and inflammations of the urinary tract                     | Stigmata                     | Decoction                                                            | Verb.           |                                                                                                                                                                                                                                                                  |
| 16 Juglandaceae                        |                |                                                                             |                              |                                                                      |                 |                                                                                                                                                                                                                                                                  |
| <i>Juglans regia</i> L.<br>jugla 1     | Nucia          | Against excessive feet perspiration                                         | Fresh leaves                 | Leaves put into the shoes                                            | Orso. Verb.     | Similar uses have been recorded elsewhere: the juice of leaves is said to be able to strengthen the skin of the feet and to preserve them from ulcers and sores [1]. The same species has been also recorded for healing ulcers [2] and as an anti-rheumatic [1] |
| 17 Labiatae                            |                |                                                                             |                              |                                                                      |                 |                                                                                                                                                                                                                                                                  |
| <i>Calamintha nepeta</i> L.<br>lami 1  | Niepita        | Against rhagades and mastitis of cattle                                     | Whole plant (dried or fresh) | Decoction for local washing                                          | Ma. Gri., Verb. | The decoction has been recorded as a mean against lice in the Majella area (Abruzzo) [48]                                                                                                                                                                        |
|                                        |                | To treat bee and insects stings and as an anti-haemorrhagic                 | Flowering tops               | The fresh plant rubbed on the skin.<br>Infusion                      |                 |                                                                                                                                                                                                                                                                  |
| <i>Mentha pulegium</i> L.<br>lami 2    | Righinedda     | To treat cough, inflammations of the respiratory tract, and cold            | Whole plant                  | Infusion                                                             | Orso. Verb.     |                                                                                                                                                                                                                                                                  |
| <i>Salvia officinalis</i> L.<br>lami 3 | Salivia        | To treat swollen testicles and related pains (also in presence of bleeding) | Leaves                       | Decoction to drink                                                   | Orso.           | Infusion of the leaves has been used against cough, asthma, and as a digestive. Compresses made of the decoction has been considered useful for treating wounds and sores [6]                                                                                    |
| <i>Sideritis syriaca</i> L.<br>lami 4  | Erva du taglio | Haemostatic for little wounds                                               | Leaves                       | Fresh leaves directly applied on wounds                              | Verb.           |                                                                                                                                                                                                                                                                  |
|                                        |                |                                                                             |                              |                                                                      |                 |                                                                                                                                                                                                                                                                  |

|                                          |              |                                  |                    |                                                                                                                                                                            |                       |                                                                                                                                                                                                                                                                                                                                                                               |
|------------------------------------------|--------------|----------------------------------|--------------------|----------------------------------------------------------------------------------------------------------------------------------------------------------------------------|-----------------------|-------------------------------------------------------------------------------------------------------------------------------------------------------------------------------------------------------------------------------------------------------------------------------------------------------------------------------------------------------------------------------|
|                                          |              |                                  |                    |                                                                                                                                                                            |                       |                                                                                                                                                                                                                                                                                                                                                                               |
| <i>Thymus pulegioides</i> L.<br>lami 5   | not reported | Cough, cold                      | Leaves, flowers    | Decoction with <i>Sisymbrium officinale</i> L., <i>Tilia platyphyllos</i> Scop., <i>Salix alba</i> L., <i>Eucalyptus globulus</i> Labill., and <i>Tussilago farfara</i> L. | Verb., Sang.          |                                                                                                                                                                                                                                                                                                                                                                               |
| 18 Leguminosae                           |              |                                  |                    | .                                                                                                                                                                          |                       |                                                                                                                                                                                                                                                                                                                                                                               |
| <i>Lupinus albus</i> L.<br>faba 1        | Luppino      | To treat dermatitis in cattle    | Whole plant        | Decoction in external washes                                                                                                                                               | Gri.                  | Against lice and ticks the same plant has been reported in diverse Italian areas: Marche [12], Toscana [16] (macerates of the seeds in water), and Polesine (infusions) [15]. The infusion of this species is also applied on horn and ears in Abruzzo [38]                                                                                                                   |
| <i>Spartium junceum</i> L.<br>faba 2     | Sparto       | In event of tumour               | Root               | Decoction with <i>Cynodon dactylon</i> L. rhizomes and <i>Arundo donax</i> L.                                                                                              | Verb.                 | The same species has been recorded to be used against stomach-aches [2], as a diuretic [2, 6] and for treating kidney stones and viper bites [6]                                                                                                                                                                                                                              |
| 19 Malvaceae                             |              |                                  |                    |                                                                                                                                                                            |                       |                                                                                                                                                                                                                                                                                                                                                                               |
| <i>Althaea officinalis</i> L.<br>malva 1 | not reported | Cough, cold                      | Roots              | Decoction with <i>Tussilago farfara</i> L., <i>Eucalyptus globulus</i> Labill., and <i>Malva sylvestris</i> L.                                                             | Verb.                 |                                                                                                                                                                                                                                                                                                                                                                               |
| <i>Malva sylvestris</i> L.<br>malva 2    | Mariva       | Lenitive, to treat gingivitis    | Leaves and flowers | Infusion or decoction, alone or with <i>Matricaria chamomilla</i> L.                                                                                                       | Ma. Verb. Aie., Papa. | Decoctions of leaves and flowers have been recorded to be used as cicatrizing means; cataplasms mixed with sugar have been used on boils and in case of whitlows. A decoction of the flowers has been recorded to treat diseases of the respiratory tract; fumigations have been recorded in case of ear pains, and the flowers as antispasmodic means in abdominal pains [1] |
| 20 Moraceae                              |              |                                  |                    |                                                                                                                                                                            |                       |                                                                                                                                                                                                                                                                                                                                                                               |
| <i>Ficus carica</i> L.<br>mora 1         | Figu         | Co-adjutant in the therapies for | Dried or fresh     | Decoction with <i>Malus</i>                                                                                                                                                | Verb.                 |                                                                                                                                                                                                                                                                                                                                                                               |

|                                               |             |                                                                                 |                               |                                                                                                           |                      |                                                                                                                                                                                                                                                                                                                                                                            |
|-----------------------------------------------|-------------|---------------------------------------------------------------------------------|-------------------------------|-----------------------------------------------------------------------------------------------------------|----------------------|----------------------------------------------------------------------------------------------------------------------------------------------------------------------------------------------------------------------------------------------------------------------------------------------------------------------------------------------------------------------------|
|                                               |             | treating cold, flu, and cough                                                   | fruits                        | <i>domestica</i> (Bork.) Bork.,<br><i>Hordeum vulgare</i> L.,<br><i>Avena sativa</i> L. and honey         |                      |                                                                                                                                                                                                                                                                                                                                                                            |
| 21 Myrtaceae                                  |             |                                                                                 |                               |                                                                                                           |                      |                                                                                                                                                                                                                                                                                                                                                                            |
| <i>Eucalyptus globulus</i> Labill.<br>myrta 1 | Calipto     | Antiseptic of the respiratory tract                                             | Leaves                        | Decoction with <i>Tussilago farfara</i> L., <i>Malva sylvestris</i> L., and <i>Althaea officinalis</i> L. | Verb.                | The decoction of the leaves and the bark has been considered useful for malaria and jaundice. Macerates in alcohol were locally applied as an anti-rheumatic. The bark mixed with leaves of <i>Quercus</i> sp., in decoctions, was employed in cases of congested spleen [1]. Decoction of leaves or boiled leaves were locally applied to wash little wounds and cuts [2] |
| <i>Myrtus communis</i> L.<br>myrt a 2         | Murtidda    | To treat cold<br><br>Against excessive sweating of the feet                     | Leaves<br><br>Ash from leaves | Infusion<br><br>The internal part of the shoes were sprinkled with ash                                    | S.Dom.<br>Tal., Verb | Leaves, burnt and powdered, are sprinkled on reddened skin of children. [1]. A decoction of the leaves was used in footbaths [2].                                                                                                                                                                                                                                          |
| 22 Oleaceae                                   |             |                                                                                 |                               |                                                                                                           |                      |                                                                                                                                                                                                                                                                                                                                                                            |
| <i>Ligustrum vulgare</i> L.<br>ole 1          | Vuccaina    | <i>Cattle stomatitis, chaps out or inside mouth (mainly in sheep and goats)</i> | Leaves                        | <i>Decoction as mouthwash or externally applied</i>                                                       | Gri., Verb.          |                                                                                                                                                                                                                                                                                                                                                                            |
| 23 Plantaginaceae                             |             |                                                                                 |                               |                                                                                                           |                      |                                                                                                                                                                                                                                                                                                                                                                            |
| <i>Plantago lanceolata</i> L.<br>planta 1     | Cincu nirvi | Cicatrizing<br><br>To treat bruises<br>finger bruises                           | Fresh leaves                  | Squashed leaves locally applied<br><br>As bandage                                                         | Verb., Gri.<br>Sang. | The same species has been recorded to stop milk secretion in cattle in Liguria [37], as haemostatic and cicatrizing in Toscana (both for cattle and humans, [16, 45]) and in Abruzzo [43]                                                                                                                                                                                  |

|                                                                                                |                             |                                                                                       |                     |                                                                                                                                   |            |                                                                                                                                                                                                                                     |
|------------------------------------------------------------------------------------------------|-----------------------------|---------------------------------------------------------------------------------------|---------------------|-----------------------------------------------------------------------------------------------------------------------------------|------------|-------------------------------------------------------------------------------------------------------------------------------------------------------------------------------------------------------------------------------------|
| <i>Plantago major</i> L.<br>planta 2                                                           | Cintu nirvi                 | Anti-helmintic<br>Detergent for wounds                                                | Leaves.             | Juice from squashed leaves; drunk<br>Juice f from squashed leaves, in external washes                                             | Ma., Verb. | The same use has been recorded in Abruzzo and in Toscana [43, 17]. The plant has been quoted also fro treating head whitlows and furuncles [1, 6], whilst crushed leaves are locally applied on wounds [6]                          |
| 24<br>Polypodiaceae                                                                            |                             |                                                                                       |                     |                                                                                                                                   |            |                                                                                                                                                                                                                                     |
| <i>Adiantum capillus-veneris</i> polyp 1                                                       | Filicieddu, Capiddu-vennari | To treat dental neuralgia and otitis                                                  | Leaves              | Decoction                                                                                                                         | Orso.      | Decoctions of the leaves have been claimed to be able to regulate the female cycle; mixed with other species, this plant has been recorded as a diuretic, antispasmodic, and relieving pains due to kidney stones [1]. Toxic plant! |
| <i>Polypodium vulgare</i> L.<br>polyp 2 and<br><i>Polypodium interjectum</i> Shivas<br>polyp 3 | Filici                      | To treat kidney stones and dysfunctions of the urinary tact                           | Leaves              | Decoction                                                                                                                         | Verb.      | The ash arising from the leaves - mixed with olive oil - is locally applied on severe burns [6]. Toxic plant!                                                                                                                       |
| 25 Primulaceae                                                                                 |                             |                                                                                       |                     |                                                                                                                                   |            |                                                                                                                                                                                                                                     |
| <i>Cyclamen</i> sp.pl.                                                                         | Not reported                | Against warts and corns                                                               | Fresh tuber         | The poultice from the tuber, locally applied                                                                                      | Verb.      | Toxic plant!                                                                                                                                                                                                                        |
| 26<br>Ranunculaceae                                                                            |                             |                                                                                       |                     |                                                                                                                                   |            |                                                                                                                                                                                                                                     |
| <i>Helleborus foetidus</i> L.<br>ranu 1                                                        | Erva da rugna, Ricchiaina   | <i>Against cattle tinea</i><br><br><i>To treat bronchitis and pneumonia of cattle</i> | <i>Fresh leaves</i> | <i>Rubbed on the skin</i><br><br><i>Bits of the root must be inserted in a fitting hole in the ear</i>                            | Ma., Verb. | <i>The same use has been recorded in Latium [22], in Emilia Romagna [34], and in Trentino [42]. This use is largely widespread in Calabria [5] and also in Emilia Romagna [33]</i>                                                  |
|                                                                                                |                             |                                                                                       |                     |                                                                                                                                   |            | The use of this plant, although very toxic, as an antidontalgic in human therapy has been reported in Calabria [1, 2]                                                                                                               |
| 27 Rhamnaceae                                                                                  |                             |                                                                                       |                     |                                                                                                                                   |            |                                                                                                                                                                                                                                     |
| <i>Ziziphus jujuba</i> Miller<br>rhamna 1                                                      | Jujolo                      | Cough                                                                                 | Ripe fruits         | Decoction with <i>Ficus carica</i> L., <i>Malus domestica</i> Bork., <i>Hordeum vulgare</i> L., <i>Avena sativa</i> L., and honey | Verb.      |                                                                                                                                                                                                                                     |
| 28 Rosaceae                                                                                    |                             |                                                                                       |                     |                                                                                                                                   |            |                                                                                                                                                                                                                                     |
| <i>Malus domestica</i>                                                                         | Pirajna,                    | Sweetener                                                                             | Fruits              | Sliced fruits in                                                                                                                  | Verb.      | Decoctions in milk of                                                                                                                                                                                                               |

|                                            |                         |                                                                                |                                      |                                                                                                                                                         |              |                                                                                                                                                                                                                                                                                                                                                                                                                                                         |
|--------------------------------------------|-------------------------|--------------------------------------------------------------------------------|--------------------------------------|---------------------------------------------------------------------------------------------------------------------------------------------------------|--------------|---------------------------------------------------------------------------------------------------------------------------------------------------------------------------------------------------------------------------------------------------------------------------------------------------------------------------------------------------------------------------------------------------------------------------------------------------------|
| Bork.<br>ro 1                              | Milu                    |                                                                                |                                      | several home-made syrups                                                                                                                                |              | the flowers and the leaves are said to be lenitive in cough, anti-fever, and sedative [6]                                                                                                                                                                                                                                                                                                                                                               |
| <i>Prunus persica</i> (L.) Batsch.<br>ro 2 | Pirsicu                 | To treat gangrenous wounds, mainly when contaminated by worms or flies         | Leaves                               | Squashed leaves are locally applied                                                                                                                     | Verb.        |                                                                                                                                                                                                                                                                                                                                                                                                                                                         |
| <i>Rosa canina</i> L.<br>ro 3              | Rosa 'i muntagna        | Against cough                                                                  | Pseudofruits (Cynhorrods)            | Decoction                                                                                                                                               | Verb., Orso  | Decoctions of the fruits in mixture with <i>Malva sylvestris</i> L. and <i>Sambucus nigra</i> L. soothe stomach pains [6]                                                                                                                                                                                                                                                                                                                               |
| <i>Rubus ulmifolius</i> Schott<br>ro 4     | Ruvine, Spine, Sirivari | Cicatrizing                                                                    | Fresh leaves, as soon as picked      | Squashed leaves, locally applied                                                                                                                        | Buonv.,Ma.   | Decoctions of the leaves are used to wash wounds [6] and as an intestinal astringent [6]. Fresh leaves are topically applied as cicatrizing means [1, 2]. The infusion of the leaves is considered emmenagogue and the decoction of the fruits diaphoretic [2]                                                                                                                                                                                          |
| 29 Rutaceae                                |                         |                                                                                |                                      |                                                                                                                                                         |              |                                                                                                                                                                                                                                                                                                                                                                                                                                                         |
| <i>Ruta graveolens</i> L.<br>ru 1          | Ruta                    | Anti-helmintic<br><br>To treat conjunctivitis ("gust of wind")<br><br>Headache | Leaves<br><br>Young stem with leaves | Decoction<br><br>The leaves were chewed and their essence breathed into the affected eye<br><br>The little stem was put under the hat or behind the ear | Verb., Orso. | Properties as anti-rheumatic and for treating lumbago pains are recognized to this plant [1, 6]. Moreover, the fried leaves and tops, locally rubbed, were employed for relieving pains due to inflammations at the sciatic nerve. The decoction of leaves was squashed in a line wrap and the tops juice was drunk as generic analgesic. An ointment obtained frying the plant with pork fat mixed with "surfu" (= Sulphur), would be cure scabies [1] |
| 30 Salicaceae                              |                         |                                                                                |                                      |                                                                                                                                                         |              |                                                                                                                                                                                                                                                                                                                                                                                                                                                         |
| <i>Salix alba</i> L.<br>sali 1             | Salicone                | Against fever and rheumatic pains                                              | Bark                                 | Decoction with <i>Sisymbrium officinale</i> (L.) Scop. and <i>Tilia platyphyllos</i> Scop.                                                              | Verb, Sang   |                                                                                                                                                                                                                                                                                                                                                                                                                                                         |
| 31 Scrophulariaceae                        |                         |                                                                                |                                      |                                                                                                                                                         |              |                                                                                                                                                                                                                                                                                                                                                                                                                                                         |
| <i>Verbascum</i> sp.pl.                    | Ntorci                  | To treat rheumatic                                                             | Flowers and leaves                   | Decoction as cataplasms or                                                                                                                              | Verb.        | A macerate made of the leaves and flowers                                                                                                                                                                                                                                                                                                                                                                                                               |



|                                                                                            |                             |                                                                                        |                               |                                                                                                                                                                                                                                            |                          |                                                                                                                                                                                                                                                                                                                             |
|--------------------------------------------------------------------------------------------|-----------------------------|----------------------------------------------------------------------------------------|-------------------------------|--------------------------------------------------------------------------------------------------------------------------------------------------------------------------------------------------------------------------------------------|--------------------------|-----------------------------------------------------------------------------------------------------------------------------------------------------------------------------------------------------------------------------------------------------------------------------------------------------------------------------|
| scro 1                                                                                     |                             | pains; as an haemostatic, and emollient                                                |                               | leaves locally applied                                                                                                                                                                                                                     |                          | in olive oil has been used for similar purposes [2]. Warm compresses imbibed of the decoction of leaves are used in case of haemorrhoids; a mucilaginous decoction was drunk for treating cold and cough [6]                                                                                                                |
| 32 Solanaceae                                                                              |                             |                                                                                        |                               |                                                                                                                                                                                                                                            |                          |                                                                                                                                                                                                                                                                                                                             |
| <i>Atropa belladonna</i> L. sola 1                                                         | not reported                | Anti- arthritic and anti-rheumatic                                                     | Dried root                    | Powdered root mixed with pork fat                                                                                                                                                                                                          | Belv. M.mo, Buonv., Gri. | The same use has been recorded in Abruzzo [43]                                                                                                                                                                                                                                                                              |
| 33 Tiliaceae                                                                               |                             |                                                                                        |                               |                                                                                                                                                                                                                                            |                          |                                                                                                                                                                                                                                                                                                                             |
| <i>Tilia platyphyllos</i> Scop. tili 1                                                     | Teglia                      | To treat cold                                                                          | Inflorescence with its bracts | Decoction with <i>Sisymbrium officinale</i> (L.) Scop., <i>Salix alba</i> L., <i>Malva sylvestris</i> L., <i>Althaea officinalis</i> L., <i>Mentha pulegium</i> L., <i>Eucalyptus globulus</i> Labill., and <i>Thymus pulegioides</i> s.l. | Verb., Sang.             |                                                                                                                                                                                                                                                                                                                             |
| 34 Umbelliferae                                                                            |                             |                                                                                        |                               |                                                                                                                                                                                                                                            |                          |                                                                                                                                                                                                                                                                                                                             |
| <i>Petroselinum sativum</i> Hoffm. api 1                                                   | Pitrusino, Prizzimulo       | To treat toothache<br><br>To treat bee and hornet stings                               | Leaves<br><br>Leaves          | Grinded and mixed with salt, locally applied upon affected tooth, then locally rubbed<br><br>Fresh leaves for local rubbing                                                                                                                | Aie.                     | Leaves are considered laxative in children, able to stop milk flow after delivery and useful in cases of menorrhoea. The poultice is considered able to treat wounds and sores, and – rubbed – to relief pains due to insect bites [6]. An infusion of the fruits is considered galactagogue                                |
| 35 Urticaceae                                                                              |                             |                                                                                        |                               |                                                                                                                                                                                                                                            |                          |                                                                                                                                                                                                                                                                                                                             |
| <i>Parietaria officinalis</i> L. urti 1 and <i>Parietaria diffusa</i> Mert. et Kock urti 2 | Erva 'u vintu, Erva 'i muri | As a detergent for healing wounds and bruises<br><br>As an antidote against viper bite | The whole plant               | Decoction from the dried plant, in washes<br><br>Decoction from the fresh plant                                                                                                                                                            | Verb., Orso., Gri.       | In other districts of Calabria the plant is used as anti-ecchymotic [2]. Compresses made of decoction are considered lenitive for the skin inflammations and burns; crushed leaves are locally applied on bruises. The infusion is diuretic and effective in the case of renal and kidney stones. The same infusion - drunk |

|                                   |         |                                                                            |                                                    |                                                                                                                                                                          |                         |                                                                                                                                                                                                                                                                                                                                     |
|-----------------------------------|---------|----------------------------------------------------------------------------|----------------------------------------------------|--------------------------------------------------------------------------------------------------------------------------------------------------------------------------|-------------------------|-------------------------------------------------------------------------------------------------------------------------------------------------------------------------------------------------------------------------------------------------------------------------------------------------------------------------------------|
|                                   |         |                                                                            |                                                    |                                                                                                                                                                          |                         | for a longer period - is considered anti-rheumatic [6]. A decoction of the aerial parts, mixed with olive oil, is said to be purgative (while without oil it is considered to protect the liver [1]                                                                                                                                 |
| <i>Urtica dioica</i> L.<br>urti 3 | Lurdica | Liver protecting<br>Haemorrhoids<br><br>Renal troubles<br><br>Mineralizing | Roots<br><br>Fresh plant<br><br>Leaves<br><br>Tops | Decoction<br><br>Local washing<br><br>The boiled leaves mixed with tomatoes were eaten to soothe renal troubles<br><br>Cooked (e.g. in omelettes, croquettes, and soups) | Orso.,<br>Verb.,<br>Ma. | The decoction of the leaves is an anti-hypertensive [1,2] and its is effective gastric pains; in mixture with <i>Cynodon dactylon</i> (L.) Pers. and <i>Parietaria</i> spp. it is said to be diuretic [1]; an infusion of the leaves and of the roots is considered anti-anaemic, anti rachitic and able to fight the weakness [2]. |

Uses in italics refer to folk veterinary medicine.

[1-6] refer to uses recorded in Calabria, [7-48] to uses recorded in various Italian areas.

Abbreviation of sites: Verb = Verbicaro, Aie = Aieta, Gri = Grisolia, Buonv = Buonvicino, Ma = Maierà, Torto = Tortora, Belv.M.mo = Belvedere Marittimo, Papa = Papasidero, S. Dom.Ta = S.Domenica Talao, Orso = Orsomarso, Sang = Sangineto
